# Supplementary material for: Spatial-Temporal Modelling of Disease Risk Accounting for PM2.5 Exposure in the Province of Pavia: An Area of the Po Valley
Source: PubMed Central journal article supplement (PMC7828801; doi:10.3390/ijerph18020658), 2021-01-14
Supplement: ijerph-18-00658-s001.pdf [file ijerph-18-00658-s001.pdf]

## Supplementary- model specifications

### 1 Model 1A - Poisson log linear model without temporal parametric trend

$$\begin{aligned}y_i &\sim \text{Poisson}(\mu_i) \\ \mu_i &= \theta_i e_i \\ \log(\mu_i) &= \beta_0 + \beta_{PM2.5}PM2.5 + \beta_{Rural}I + \log(e_i) \\ \beta_k &\sim \text{Normal}(0,3^2)\end{aligned}$$

### 2 Model 1B - Poisson log linear model with temporal parametric trend

$$\begin{aligned}y_i &\sim \text{Poisson}(\mu_i) \\ \mu_i &= \theta_i e_i \\ \log(\mu_i) &= \beta_0 + \beta_{PM2.5}PM2.5_i + \beta_{Rural}I_i + \beta_{Year}Year_i + \log(e_i) \\ \beta_k &\sim \text{Normal}(0,3^2)\end{aligned}$$

### 3. Model 2A - Poisson log linear model with county level random intercept without temporal parametric trend

$$\begin{aligned}y_i &\sim \text{Poisson}(\mu_i) \\ \mu_i &= \theta_i e_i \\ \log(\mu_i) &= \beta_0 + \beta_{PM2.5}PM2.5_i + \beta_{Rural}I_i + \beta_{Year}Year_i + v_i + \log(e_i) \\ \beta_0 &\sim \text{Normal}(-0.0207, 0.0117) \\ \beta_{PM2.5} &\sim \text{Normal}(0.0731, 0.0227) \\ \beta_{Rural} &\sim \text{Normal}(0.0313, 0.0180) \\ v_i &\sim \text{Normal}(0, \sigma_v^2) \\ \sigma_v^2 &\sim \text{Inverse - Gamma}(1, 0.01)\end{aligned}$$

### 4. Model 2B - Poisson log linear model with county level random intercept with temporal parametric trend

$$\begin{aligned}y_i &\sim \text{Poisson}(\mu_i) \\ \mu_i &= \theta_i e_i \\ \log(\mu_i) &= \beta_0 + \beta_{PM2.5}PM2.5_i + \beta_{Rural}I_i + \beta_{Year}Year_i + v_i + \log(e_i) \\ \beta_0 &\sim \text{Normal}(-0.0264, 0.0175) \\ \beta_{PM2.5} &\sim \text{Normal}(0.0747, 0.0233)\end{aligned}$$

$$\begin{aligned}\beta_{Rural} &\sim Normal(0.0316, 0.0182) \\ \beta_{Year} &\sim Normal(0.00210, 0.00488) \\ v_i &\sim Normal(0, \sigma_v^2) \\ \sigma_v^2 &\sim Inverse - Gamma(1, 0.01)\end{aligned}$$

**5. Model 3A - Poisson log linear model with county level spatial random intercept without temporal parametric trend**

$$\begin{aligned}y_i &\sim Poisson(\mu_i) \\ \mu_i &= \theta_i e_i \\ \log(\mu_i) &= \beta_0 + \beta_{PM2.5}PM2.5_i + \beta_{Rural}I_i + \beta_{Year}Year_i + u_i + \log(e_i) \\ \beta_0 &\sim Normal(-0.0207, 0.0117) \\ \beta_{PM2.5} &\sim Normal(0.0731, 0.0227) \\ \beta_{Rural} &\sim Normal(0.0313, 0.0180) \\ u_i | u_{j \neq i} &\sim Normal\left(\frac{\sum_{j \neq i} c_{ij} u_j}{\sum_{j \neq i} c_{ij}}, \frac{\sigma_u^2}{\sum_{j \neq i} c_{ij}}\right) \\ \sigma_u^2 &\sim Inverse - Gamma(1, 0.01)\end{aligned}$$

**6. Model 3B - Poisson log linear model with county level spatial random intercept with temporal parametric trend**

$$\begin{aligned}y_i &\sim Poisson(\mu_i) \\ \mu_i &= \theta_i e_i \\ \log(\mu_i) &= \beta_0 + \beta_{PM2.5}PM2.5_i + \beta_{Rural}I_i + \beta_{Year}Year_i + u_i + \log(e_i) \\ \beta_0 &\sim Normal(-0.0264, 0.0175) \\ \beta_{PM2.5} &\sim Normal(0.0747, 0.0233) \\ \beta_{Rural} &\sim Normal(0.0316, 0.0182) \\ u_i | u_{j \neq i} &\sim Normal\left(\frac{\sum_{j \neq i} c_{ij} u_j}{\sum_{j \neq i} c_{ij}}, \frac{\sigma_u^2}{\sum_{j \neq i} c_{ij}}\right) \\ \sigma_u^2 &\sim Inverse - Gamma(1, 0.01)\end{aligned}$$

**7. Model 4A - Poisson log linear model with county level spatial and non-spatial random intercept without temporal parametric trend**

$$y_i \sim Poisson(\mu_i)$$

$$\begin{aligned}
\mu_i &= \theta_i e_i \\
\log(\mu_i) &= \beta_0 + \beta_{PM2.5}PM2.5_i + \beta_{Rural}I_i + \beta_{Year}Year_i + u_i + v_i + \log(e_i) \\
\beta_0 &\sim Normal(-0.0207, 0.0117) \\
\beta_{PM2.5} &\sim Normal(0.0731, 0.0227) \\
\beta_{Rural} &\sim Normal(0.0313, 0.0180) \\
u_i|u_{j \neq i} &\sim Normal\left(\frac{\sum_{j \neq i} c_{ij} u_j}{\sum_{j \neq i} c_{ij}}, \frac{\sigma_u^2}{\sum_{j \neq i} c_{ij}}\right) \\
v_i &\sim Normal(0, \sigma_v^2) \\
\sigma_u^2 &\sim Inverse - Gamma(6.3462, 0.1280) \\
\sigma_v^2 &\sim Inverse - Gamma(22.8692, 0.6121)
\end{aligned}$$

**8. Model 4B - Poisson log linear model with county level spatial and non-spatial random intercept without temporal parametric trend**

$$\begin{aligned}
y_i &\sim Poisson(\mu_i) \\
\mu_i &= \theta_i e_i \\
\log(\mu_i) &= \beta_0 + \beta_{PM2.5}PM2.5_i + \beta_{Rural}I_i + \beta_{Year}Year_i + u_i + v_i + \log(e_i) \\
\beta_0 &\sim Normal(-0.0264, 0.0175) \\
\beta_{PM2.5} &\sim Normal(0.0747, 0.0233) \\
\beta_{Rural} &\sim Normal(0.0316, 0.0182) \\
\beta_{Year} &\sim Normal(0.00210, 0.00488) \\
u_i|u_{j \neq i} &\sim Normal\left(\frac{\sum_{j \neq i} c_{ij} u_j}{\sum_{j \neq i} c_{ij}}, \frac{\sigma_u^2}{\sum_{j \neq i} c_{ij}}\right) \\
v_i &\sim Normal(0, \sigma_v^2) \\
\sigma_u^2 &\sim Inverse - Gamma(6.3361, 0.1262) \\
\sigma_v^2 &\sim Inverse - Gamma(22.8458, 0.6145)
\end{aligned}$$
